# Supplementary material
Source: PubMed Central journal article supplement (PMC7341068)
Supplement: NIHMS1595913-supplement-cncr32416-sup-0001-Supinfo_pdf.pdf [file NIHMS1595913-supplement-cncr32416-sup-0001-Supinfo_pdf.pdf]

**Supplemental Table 1.** Clinical and Pathologic Characteristics of the Study Group and Excluded Patients.

| Characteristic                                | Study Group<br>(N=759) | Excluded Cases<br>(N=61) | P Value* |
|-----------------------------------------------|------------------------|--------------------------|----------|
| Sex – no. (%)                                 |                        |                          | 0.07     |
| Male                                          | 593 (78)               | 54 (89)                  |          |
| Female                                        | 166 (22)               | 7 (11)                   |          |
| Age – y                                       |                        |                          | 0.13     |
| Mean                                          | 60.9                   | 58.7                     |          |
| Median (range)                                | 61 (18-86)             | 58 (35-84)               |          |
| Histology in the Resection Specimen – no. (%) |                        |                          | 0.95     |
| Epithelioid                                   | 483 (64)               | 39 (64)                  |          |
| Biphasic                                      | 245 (32)               | 20 (33)                  |          |
| Sarcomatoid                                   | 31 (9)                 | 2 (3)                    |          |
| Primary location – no. (%)                    |                        |                          | 0.35     |
| Left Pleura                                   | 323 (43)               | 22 (36)                  |          |
| Right Pleura                                  | 436 (57)               | 39 (64)                  |          |
| Clinical stage† – no. (%)                     |                        |                          | 0.06     |
| Stage I                                       | 14 (3)                 | 0 (0)                    |          |
| Stage II                                      | 50 (10)                | 2 (5)                    |          |
| Stage III                                     | 344 (66)               | 31 (84)                  |          |
| Stage IV                                      | 112 (21)               | 4 (11)                   |          |
| Type of Surgery – no. (%)                     |                        |                          | 0.25     |
| Pleurectomy/Decortication                     | 240 (32)               | 24 (39)                  |          |
| Extrapleural Pneumonectomy                    | 519 (68)               | 37 (61)                  |          |

\* P value comparing patients with histologic material available for evaluation included in the study and excluded patients who had no biopsy specimen material available for evaluation.

† 24 patients in the excluded group and 239 patients in the study group did not have clinical staging information available.

| <b>Supplemental Table 2.</b> Relationship between Histology Findings in the Initial Thoracoscopic Biopsies and Final Diagnosis in the Resection Specimen in Diffuse Malignant Pleural Mesothelioma (n=728)* |             |          |             |       |
|-------------------------------------------------------------------------------------------------------------------------------------------------------------------------------------------------------------|-------------|----------|-------------|-------|
| <b>Resection Specimen Histology</b>                                                                                                                                                                         |             |          |             |       |
| <b>Number (% of initial biopsy)</b>                                                                                                                                                                         |             |          |             |       |
|                                                                                                                                                                                                             | Epithelioid | Biphasic | Sarcomatoid | Total |
| <b>Thoracoscopic Biopsy Histology</b>                                                                                                                                                                       |             |          |             |       |
| Epithelioid                                                                                                                                                                                                 | 448 (81)    | 106 (19) | 0 (0)       | 554   |
| Biphasic                                                                                                                                                                                                    | 14 (11)     | 115 (86) | 4 (3)       | 133   |
| Sarcomatoid                                                                                                                                                                                                 | 0 (0)       | 5 (15)   | 28 (85)     | 33    |
| Indeterminate†                                                                                                                                                                                              | 5 (63)      | 3 (38)   | 0 (0)       | 8     |
| <b>Total</b>                                                                                                                                                                                                | 467 (64)    | 229 (32) | 32 (4)      | 728   |

\* Eight patients diagnosed with malignant mesothelioma with indeterminate histologic type on initial biopsies were excluded from statistical analysis.

† Not all percentages total 100% due to rounding.

**Supplemental Table 3.** Relationship between Histology Findings in the Core Biopsies and Final Diagnosis in the Resection Specimen in Diffuse Malignant Pleural Mesothelioma (n=31)

| <b>Resection Specimen Histology</b> |             |          |             |       |
|-------------------------------------|-------------|----------|-------------|-------|
| <b>Number (% of initial biopsy)</b> |             |          |             |       |
|                                     | Epithelioid | Biphasic | Sarcomatoid | Total |
| <b>Core-needle Biopsy Histology</b> |             |          |             |       |
| Epithelioid                         | 15 (71)     | 6 (29)   | 0 (0)       | 21    |
| Biphasic                            | 1 (14)      | 6 (86)   | 0 (0)       | 7     |
| Sarcomatoid                         | 0 (0)       | 2 (67)   | 1 (33)      | 3     |
| <b>Total</b>                        | 16(52)      | 14 (45)  | 1 (3)       | 31    |

**Supplemental Table 4.** Comparison of positive predictive value, sensitivity, specificity, and positive test likelihood ratios of histology in initial thoracoscopic biopsy for each type of diffuse malignant pleural mesothelioma (n=720)

|                                       | Positive Predictive Value (%) | Sensitivity (%) | Specificity (%) | Positive Likelihood Ratio |
|---------------------------------------|-------------------------------|-----------------|-----------------|---------------------------|
| <b>Thoracoscopic Biopsy Histology</b> |                               |                 |                 |                           |
| Epithelioid                           | 80.9                          | 97.0            | 58.9            | 2.4                       |
| Biphasic                              | 86.5                          | 50.9            | 96.4            | 14.0                      |
| Sarcomatoid                           | 84.8                          | 87.5            | 99.3            | 120.4                     |

**Supplemental Table 5.** Comparison of positive predictive value, sensitivity, specificity, and positive test likelihood ratios of histology in initial core biopsy for each type of diffuse malignant pleural mesothelioma ( $n=31$ )

|                                     | Positive Predictive Value (%) | Sensitivity (%) | Specificity (%) | Positive Likelihood Ratio |
|-------------------------------------|-------------------------------|-----------------|-----------------|---------------------------|
| <b>Core-needle Biopsy Histology</b> |                               |                 |                 |                           |
| Epithelioid                         | 71.4                          | 93.8            | 60.0            | 2.3                       |
| Biphasic                            | 85.7                          | 42.9            | 94.1            | 7.3                       |
| Sarcomatoid                         | 33.3                          | 100.0           | 93.3            | 15.0                      |

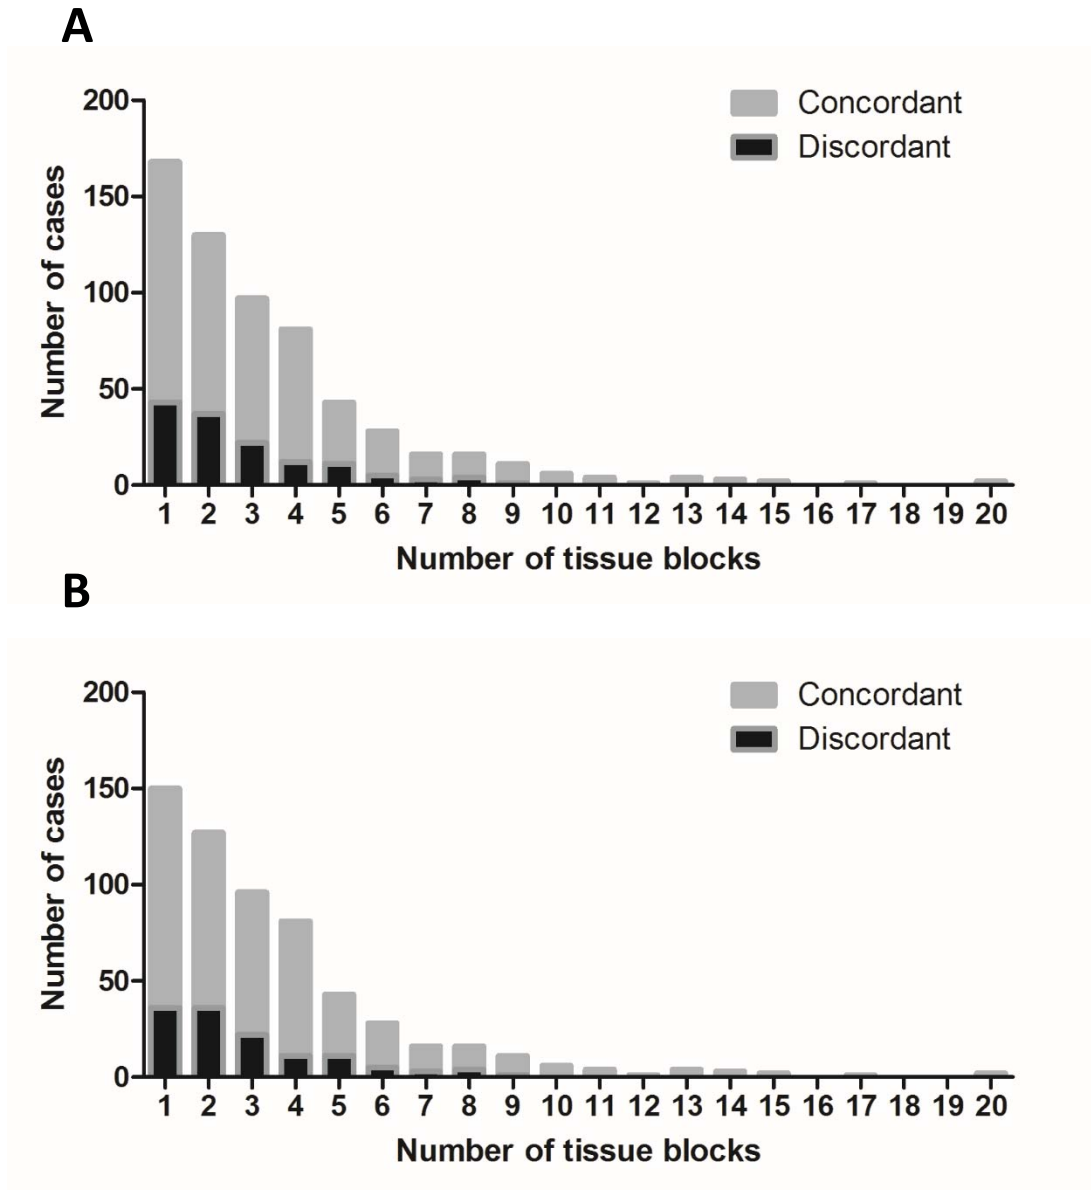

Histograms plotting the number of tissue blocks in concordant and discordant core and thoracoscopic biopsies (A) and thoracoscopic only biopsies (B).

**A**

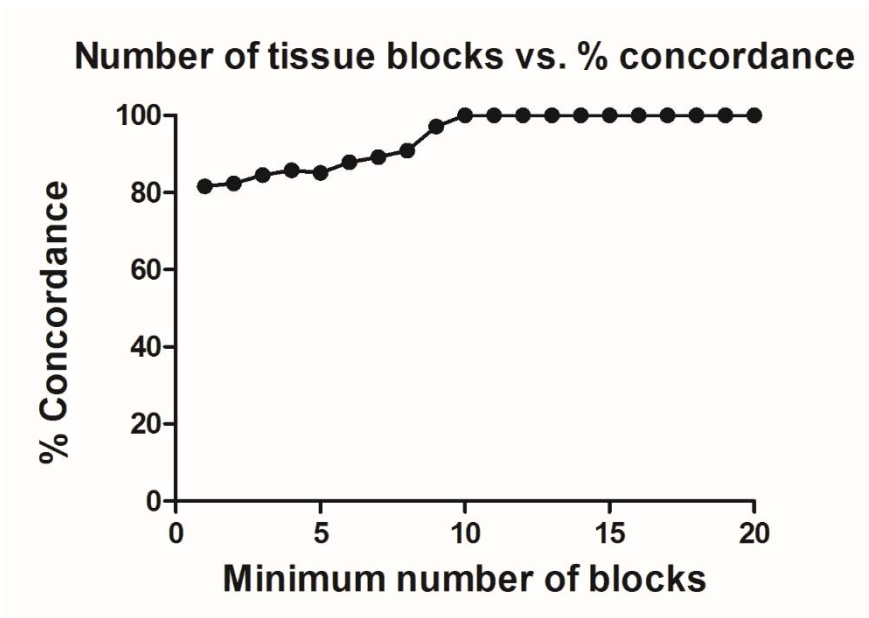

**B**

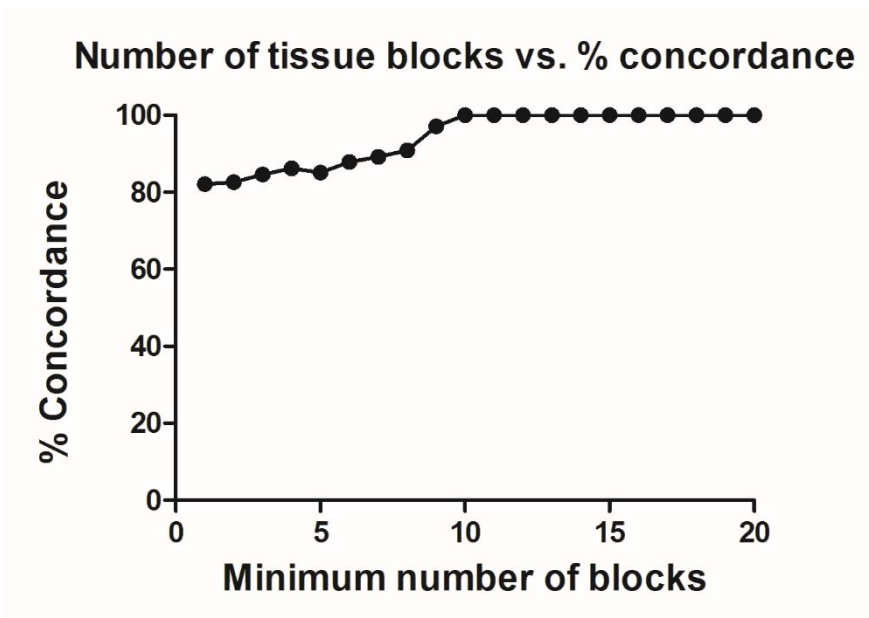

Relationship between the diagnostic accuracy (% concordance) and minimum number of tissue blocks sampled in core and thoracoscopic biopsies (A) and thoracoscopic only biopsies (B).
